# Supplementary material for: Androgen Modulates Functions of Endothelial Progenitor Cells through Activated Egr1 Signaling
Source: Stem Cells Int. 2015 Nov 30;2016:7057894. doi: 10.1155/2016/7057894 (PMC4677258; doi:10.1155/2016/7057894)
Supplement: Supplementary file 1 — The differently expressed genes in the microarray expression analysis of the DHT-treated EPCs. [file 7057894.f1.xlsx]

## Sheet: Sheet1
Probe Set ID	p-value	FDR	Fold-change（DHT/NC）	style	Gene Symbol
10566205	0.0045438	0.893	1.78	up	Usp17ld
10375572	0.0068469	0.893	1.71	up	Olfr1382
10605559	0.0014747	0.854	1.68	up	---
10413012	0.0248101	0.893	1.64	up	Fut11
10476590	0.0293187	0.893	1.6	up	Macrod2
10444291	0.0002006	0.774	1.51	up	H2-Ob
10572046	0.0220379	0.893	1.51	up	Gm10663
10556546	0.0050417	0.893	1.5	up	Calcb
10545229	0.0216023	0.893	1.48	up	---
10462442	0.0011566	0.841	1.47	up	Il33
10525837	0.0116436	0.893	1.47	up	Dnah10
10600533	0.0110042	0.893	1.46	up	Gm5397
10574023	3.09e-05	0.462	1.44	up	Mt2
10355259	0.0089274	0.893	1.43	up	Myl1
10381111	0.0035384	0.893	1.43	up	Gm11560
10461055	0.0167783	0.893	1.43	up	---
10515981	0.0001661	0.774	1.43	up	Mir30e
10545200	0.0292096	0.893	1.43	up	---
10608570	0.0038642	0.893	1.43	up	---
10565994	0.0068793	0.893	1.41	up	Art2b
10405755	0.0331219	0.893	1.41	up	---
10458890	0.0038411	0.893	1.4	up	Gm4950
10513002	0.0194997	0.893	1.37	up	Rps15a-ps8
10591416	0.003772	0.893	1.37	up	---
10349100	0.0021103	0.876	1.36	up	---
10356510	0.0126757	0.893	1.36	up	Iqca
10432918	0.0244073	0.893	1.36	up	Krt8
10454061	0.022472	0.893	1.36	up	LOC101056031
10456005	0.0004287	0.774	1.36	up	Cd74
10598152	0.0055769	0.893	1.36	up	BC147527
10368222	0.0033412	0.893	1.35	up	4930444G20Rik
10374777	0.0062388	0.893	1.35	up	Efemp1
10380135	0.0007911	0.841	1.35	up	Mir142
10415013	0.027585	0.893	1.35	up	Traj54
10444995	0.025392	0.893	1.35	up	Gm19684
10415019	0.0030728	0.893	1.34	up	Traj41
10476489	0.0026114	0.893	1.34	up	Gm14056
10531415	0.0017328	0.876	1.34	up	Cxcl10
10546450	0.000767	0.841	1.34	up	Adamts9
10598569	0.0228517	0.893	1.34	up	Gm5635
10472467	0.0379143	0.893	1.34	up	---
10444298	0.0014768	0.854	1.33	up	H2-Eb1
10450154	0.0021143	0.876	1.33	up	Psmb9
10454129	0.009242	0.893	1.33	up	Dsg1b
10397346	0.0027793	0.893	1.32	up	Fos
10498644	0.0324632	0.893	1.32	up	---
10509856	0.0263092	0.893	1.32	up	---
10344705	0.002783	0.893	1.32	up	---
10362160	0.0132812	0.893	1.31	up	Taar7c-ps
10455957	0.0300397	0.893	1.31	up	Gm5970
10409259	0.011781	0.893	1.31	up	---
10362440	0.0472956	0.893	1.3	up	Trdn
10390651	0.0201029	0.893	1.3	up	---
10419368	0.0199353	0.893	1.3	up	---
10472418	0.0035094	0.893	1.3	up	Gm13629
10494415	0.0339464	0.893	1.3	up	---
10496485	0.0042812	0.893	1.3	up	Eif4e
10503161	0.018456	0.893	1.3	up	Chd7
10597074	0.0079309	0.893	1.3	up	---
10403868	0.0289927	0.893	1.3	up	---
10562397	0.0411244	0.893	1.3	up	---
10350749	0.0317309	0.893	1.29	up	Gm5531
10454782	0.00021	0.774	1.29	up	Egr1
10466839	0.0457952	0.893	1.29	up	---
10469568	0.018491	0.893	1.29	up	1810010K12Rik
10497894	0.0092939	0.893	1.29	up	Cetn4
10581011	0.00276	0.893	1.29	up	---
10583384	0.0138288	0.893	1.29	up	---
10403031	0.0259702	0.893	1.28	up	---
10410931	0.0010459	0.841	1.28	up	Vcan
10427492	0.0100762	0.893	1.28	up	LOC101056551
10428002	0.0052137	0.893	1.28	up	Ankrd33b
10512279	0.001114	0.841	1.28	up	Cntfr
10576493	0.007361	0.893	1.28	up	---
10346762	0.0082332	0.893	1.28	up	---
10356508	0.0034536	0.893	1.28	up	---
10589128	0.0312952	0.893	1.28	up	---
10360306	0.0011734	0.841	1.27	up	Slamf8
10391005	0.0015284	0.854	1.27	up	Krt36
10439289	0.0265753	0.893	1.27	up	Gm10813
10526869	0.0060861	0.893	1.27	up	---
10559221	0.0052608	0.893	1.27	up	Tnnt3
10574143	0.0464419	0.893	1.27	up	Nlrc5
10597134	0.0135373	0.893	1.27	up	5830462I19Rik
10604761	0.0052073	0.893	1.27	up	Mir504
10605505	0.0285855	0.893	1.27	up	Gm8761
10378570	0.0302193	0.893	1.26	up	Mir22hg
10384456	0.0020192	0.876	1.26	up	---
10423742	0.0144454	0.893	1.26	up	Polr2k
10434930	0.033111	0.893	1.26	up	1700025H01Rik
10466274	0.0013501	0.841	1.26	up	Olfr1419
10472930	0.0171457	0.893	1.26	up	Sp9
10483817	0.008852	0.893	1.26	up	6030499A19Rik
10487040	0.0053815	0.893	1.26	up	Fbn1
10491474	0.0278969	0.893	1.26	up	Gm5708
10518833	0.0193485	0.893	1.26	up	Camta1
10526724	0.0134011	0.893	1.26	up	Smok3b
10540213	0.0054785	0.893	1.26	up	---
10567355	0.0077538	0.893	1.26	up	Gprc5b
10602825	0.0203471	0.893	1.26	up	---
10351471	0.0237819	0.893	1.25	up	Uhmk1
10357590	0.0004291	0.774	1.25	up	Dyrk3
10358513	0.0144696	0.893	1.25	up	Hmcn1
10362937	0.042094	0.893	1.25	up	---
10414475	0.01604	0.893	1.25	up	Olfr738
10458828	0.0243959	0.893	1.25	up	Cdo1
10514568	0.0121683	0.893	1.25	up	Tm2d1
10516046	0.0192925	0.893	1.25	up	Gm12877
10532588	0.0438105	0.893	1.25	up	Myo18b
10539981	0.0030762	0.893	1.25	up	Vmn1r54
10545177	0.0021648	0.876	1.25	up	Igkv19-93
10546229	0.0156926	0.893	1.25	up	Vmn1r-ps27
10575596	0.0339038	0.893	1.25	up	---
10596135	0.007148	0.893	1.25	up	Slco2a1
10599281	0.0048997	0.893	1.25	up	Gm21098
10344933	0.0373055	0.893	1.25	up	---
10598216	0.0018633	0.876	1.25	up	---
10357875	0.0035605	0.893	1.24	up	Btg2
10379936	0.0081898	0.893	1.24	up	Tbx2
10409905	0.0168423	0.893	1.24	up	Ctsr
10414734	0.0458313	0.893	1.24	up	Trav7d-4
10454233	0.039845	0.893	1.24	up	---
10492004	0.0350558	0.893	1.24	up	---
10493900	0.0230723	0.893	1.24	up	Lce3c
10499952	0.0282001	0.893	1.24	up	Crct1
10504619	0.0400962	0.893	1.24	up	E230008N13Rik
10506330	0.0499255	0.893	1.24	up	Gm12800
10538878	0.0120243	0.893	1.24	up	---
10547888	0.0007646	0.841	1.24	up	Gpr162
10596041	0.037085	0.893	1.24	up	Il20rb
10437239	0.0114484	0.893	1.24	up	---
10378568	0.0019446	0.876	1.23	up	Mir22hg
10408689	0.0043995	0.893	1.23	up	Nrn1
10415957	0.0082854	0.893	1.23	up	---
10439285	0.0292305	0.893	1.23	up	Gm6815
10444821	0.0010355	0.841	1.23	up	H2-Q5
10446777	0.0157582	0.893	1.23	up	Ehd3
10484584	0.0137812	0.893	1.23	up	Gm13719
10493664	0.0015416	0.854	1.23	up	Nup210l
10502552	0.0139706	0.893	1.23	up	Clca1
10512682	0.0010906	0.841	1.23	up	Zbtb5
10530278	0.0392841	0.893	1.23	up	---
10549751	0.0441635	0.893	1.23	up	Zfp865
10554965	0.0090891	0.893	1.23	up	---
10560117	0.0230483	0.893	1.23	up	Sult2a3
10567546	0.0392449	0.893	1.23	up	Crym
10588195	0.0099678	0.893	1.23	up	9630041A04Rik
10598222	0.0035843	0.893	1.23	up	Gm5925
10607557	0.0164322	0.893	1.23	up	Gm15173
10608295	0.0023539	0.893	1.23	up	---
10589870	0.0070966	0.893	1.23	up	---
10355530	0.0321001	0.893	1.22	up	Tns1
10367393	0.0462717	0.893	1.22	up	Wibg
10373608	0.0342709	0.893	1.22	up	Olfr766
10374551	0.0090681	0.893	1.22	up	Rpl15-ps1
10374771	0.0009338	0.841	1.22	up	Mir216b
10397179	0.0341685	0.893	1.22	up	Dnal1
10398569	0.0037915	0.893	1.22	up	Zfp839
10413993	0.0049151	0.893	1.22	up	LOC101055685
10417176	0.0013656	0.841	1.22	up	Zic2
10421853	0.0112754	0.893	1.22	up	Lect1
10425923	0.0056428	0.893	1.22	up	Fam118a
10431558	0.0077768	0.893	1.22	up	Odf3b
10438405	0.0061393	0.893	1.22	up	Iglv1
10442924	0.0193701	0.893	1.22	up	D630044L22Rik
10444814	0.0055072	0.893	1.22	up	H2-Q4
10451213	0.006168	0.893	1.22	up	Rsph9
10456248	0.0056219	0.893	1.22	up	Onecut2
10460735	0.0085547	0.893	1.22	up	BC048609
10469782	0.0235176	0.893	1.22	up	Gm13410
10485068	0.0390549	0.893	1.22	up	Gm10805
10489151	0.0033494	0.893	1.22	up	Mroh8
10490094	0.0068681	0.893	1.22	up	4930470P17Rik
10490129	0.0019936	0.876	1.22	up	Bmp7
10498357	0.0077873	0.893	1.22	up	F630111L10Rik
10524394	0.0133568	0.893	1.22	up	---
10527332	0.0019494	0.876	1.22	up	Nptx2
10530013	0.0444786	0.893	1.22	up	Ccdc149
10532903	0.0133568	0.893	1.22	up	---
10535559	0.0074425	0.893	1.22	up	Baiap2l1
10545130	0.0152824	0.893	1.22	up	Gadd45a
10546624	0.0318265	0.893	1.22	up	Lmod3
10549041	0.0167026	0.893	1.22	up	Slco1a5
10559361	0.0131357	0.893	1.22	up	Fgf3
10593884	0.0229494	0.893	1.22	up	Gm10658
10589190	0.0178288	0.893	1.22	up	---
10344990	0.0010616	0.841	1.21	up	Crispld1
10361882	0.0125927	0.893	1.21	up	Nhsl1
10362113	0.0147309	0.893	1.21	up	Gm10824
10362424	0.0021568	0.876	1.21	up	Trdn
10365966	0.0473409	0.893	1.21	up	---
10370210	0.0148868	0.893	1.21	up	Col6a1
10370603	0.0055754	0.893	1.21	up	Odf3l2
10375557	0.0085719	0.893	1.21	up	Olfr1388
10379944	0.0103232	0.893	1.21	up	Tbx4
10390535	0.0228569	0.893	1.21	up	Arl5c
10390763	0.0166401	0.893	1.21	up	Ccr7
10402572	0.0111981	0.893	1.21	up	Ccdc85c
10419715	0.0178866	0.893	1.21	up	Olfr1510
10424622	0.0175791	0.893	1.21	up	---
10430344	0.0266131	0.893	1.21	up	Il2rb
10437646	0.0043018	0.893	1.21	up	Tekt5
10449452	0.0063872	0.893	1.21	up	Fkbp5
10450790	0.0091573	0.893	1.21	up	H2-M1
10452087	0.0078233	0.893	1.21	up	Safb2
10458046	0.0086652	0.893	1.21	up	Nrep
10466278	0.023485	0.893	1.21	up	Olfr1424
10490989	0.0033727	0.893	1.21	up	Cp
10504666	0.0070312	0.893	1.21	up	E230008N13Rik
10516721	0.0269952	0.893	1.21	up	Gm12967
10525741	0.0101335	0.893	1.21	up	Snrnp35
10531931	0.0041749	0.893	1.21	up	Sparcl1
10537298	0.0042825	0.893	1.21	up	Chrm2
10550972	0.0389365	0.893	1.21	up	Phldb3
10580282	0.0074796	0.893	1.21	up	Junb
10598169	0.0097995	0.893	1.21	up	Gm3415
10604124	0.0213612	0.893	1.21	up	Gm21098
10606386	0.0234907	0.893	1.21	up	Gm732
10607600	0.0135791	0.893	1.21	up	Gm15195
10351206	0.009799	0.893	1.2	up	Selp
10351465	0.0205358	0.893	1.2	up	1700084C01Rik
10351832	0.0121045	0.893	1.2	up	Ccdc19
10352150	0.0323846	0.893	1.2	up	---
10356470	0.0038568	0.893	1.2	up	Glrp1
10358565	0.0030335	0.893	1.2	up	Hmcn1
10368050	0.0075562	0.893	1.2	up	Ect2l
10375436	0.0271129	0.893	1.2	up	Fam71b
10377018	0.0025253	0.893	1.2	up	Myh3
10377774	0.0207614	0.893	1.2	up	Mgl2
10390175	0.0481156	0.893	1.2	up	Ngfr
10391762	0.0185647	0.893	1.2	up	Gjc1
10413726	0.0149801	0.893	1.2	up	Tnnc1
10424557	0.0191346	0.893	1.2	up	Gm7125
10433055	0.0244382	0.893	1.2	up	Mir688
10434719	0.0167115	0.893	1.2	up	Kng1
10450069	0.0476139	0.893	1.2	up	H2-K2
10460259	0.0385963	0.893	1.2	up	Aldh3b2
10474958	0.019983	0.893	1.2	up	Dll4
10481700	0.0072127	0.893	1.2	up	1700019L03Rik
10494001	0.0327614	0.893	1.2	up	Tdpoz4
10495134	0.0118522	0.893	1.2	up	---
10497682	0.0212316	0.893	1.2	up	Kcnmb3
10533229	0.001568	0.854	1.2	up	Oas1e
10533320	0.0038041	0.893	1.2	up	Adam1b
10545569	0.0022351	0.883	1.2	up	Reg3g
10549237	0.014435	0.893	1.2	up	Casc1
10578393	0.0081996	0.893	1.2	up	Triml1
10591129	0.0120153	0.893	1.2	up	Fat3
10593981	0.0180789	0.893	1.2	up	Cyp1a2
10599269	0.0069437	0.893	1.2	up	Gm21098
10601863	0.0242788	0.893	1.2	up	Nsa2-ps2
10525914	0.0083942	0.893	1.2	up	---
10367816	0.0239175	0.893	0.8	down	Adgb
10373467	0.0035805	0.893	0.8	down	Erbb3
10381105	0.0070208	0.893	0.8	down	Gm11567
10408125	0.0427731	0.893	0.8	down	Vmn1r190-ps
10408928	0.0009524	0.841	0.8	down	Hspb1
10408932	0.0187558	0.893	0.8	down	---
10412078	0.0016937	0.876	0.8	down	Gapt
10414760	0.0045294	0.893	0.8	down	A430107P09Rik
10416120	0.0013697	0.841	0.8	down	4930578I07Rik
10421875	0.0010522	0.841	0.8	down	---
10424555	0.0098811	0.893	0.8	down	---
10427159	0.0246031	0.893	0.8	down	Gm9918
10478461	0.0210184	0.893	0.8	down	Svs3a
10497580	0.0015684	0.854	0.8	down	---
10521759	0.0141007	0.893	0.8	down	Slit2
10533120	0.0251436	0.893	0.8	down	Gm10390
10538206	0.0291779	0.893	0.8	down	Ccdc126
10541513	0.0457348	0.893	0.8	down	---
10566283	0.0097327	0.893	0.8	down	Olfr64
10593473	0.025522	0.893	0.8	down	1810046K07Rik
10602499	0.0212632	0.893	0.8	down	n-R5s13
10364109	0.0193841	0.893	0.79	down	Vpreb3
10410295	0.0284491	0.893	0.79	down	Zfp595
10416110	0.0124509	0.893	0.79	down	Gm5464
10421737	0.0128611	0.893	0.79	down	Tnfsf11
10440145	0.0115765	0.893	0.79	down	4933431I19Rik
10445268	0.0202625	0.893	0.79	down	Gpr116
10485948	0.0003278	0.774	0.79	down	Grem1
10510239	0.0418319	0.893	0.79	down	Gm16503
10517419	0.0113027	0.893	0.79	down	Gm12988
10526410	0.0004622	0.784	0.79	down	Hspb1
10537494	0.0410471	0.893	0.79	down	Ssbp1
10546134	0.0259082	0.893	0.79	down	Kbtbd12
10566922	0.0427837	0.893	0.79	down	B430319F04Rik
10582464	0.0165445	0.893	0.79	down	---
10507431	0.021356	0.893	0.79	down	---
10363224	0.0364051	0.893	0.78	down	Fabp7
10373692	0.0112463	0.893	0.78	down	Vmn2r86
10415857	0.0105994	0.893	0.78	down	Fam167a
10511719	0.0003306	0.774	0.78	down	---
10541873	0.0279196	0.893	0.78	down	Mrpl51
10555174	0.0012388	0.841	0.78	down	Lrrc32
10566409	0.0034362	0.893	0.78	down	Olfr670
10575548	0.0045005	0.893	0.78	down	---
10402347	0.0148203	0.893	0.77	down	Ifi27l2a
10408529	0.0182179	0.893	0.77	down	---
10419154	0.0012155	0.841	0.77	down	Ear2
10457203	0.0461637	0.893	0.77	down	---
10459618	0.0107201	0.893	0.77	down	---
10474915	0.0030431	0.893	0.77	down	Gchfr
10499935	0.0012439	0.841	0.77	down	Lce1i
10345527	0.0128959	0.893	0.76	down	---
10497337	0.0002077	0.774	0.76	down	Car1
10507475	0.0067944	0.893	0.76	down	---
10513008	0.0023711	0.893	0.76	down	Klf4
10552258	0.0038892	0.893	0.76	down	---
10603266	0.0002762	0.774	0.76	down	Nudt10
10603736	0.0102756	0.893	0.76	down	---
10377429	0.0390396	0.893	0.75	down	Snord118
10390919	0.0003763	0.774	0.75	down	Krtap4-1
10399428	0.0390396	0.893	0.75	down	Snord118
10492436	0.0189028	0.893	0.75	down	---
10499937	0.0099008	0.893	0.75	down	Lce1j
10510908	0.0267802	0.893	0.75	down	---
10561052	0.001114	0.841	0.74	down	Gm15495
10561345	0.0090989	0.893	0.74	down	Zfp780b
10566595	0.0104435	0.893	0.74	down	Olfr697
10410375	0.0007924	0.841	0.73	down	Zfp85-rs1
10479740	0.0491309	0.893	0.73	down	Gm5466
10499930	0.0002251	0.774	0.73	down	Lce1g
10557175	0.0222558	0.893	0.73	down	---
10578688	0.005782	0.893	0.73	down	---
10381460	0.0054293	0.893	0.72	down	Rdm1
10381470	0.0054293	0.893	0.72	down	---
10381472	0.0054293	0.893	0.72	down	---
10391488	0.0054293	0.893	0.72	down	---
10550818	0.0227754	0.893	0.72	down	Vmn1r174
10381458	0.0043187	0.893	0.71	down	Rdm1
10395908	0.0105328	0.893	0.71	down	---
10429564	0.0052694	0.893	0.7	down	Ly6a
10347218	0.018751	0.893	0.69	down	---
10355500	0.0008725	0.841	0.69	down	Igfbp5
10493889	5.7e-05	0.548	0.69	down	Lce1c
10450731	0.0257501	0.893	0.67	down	---
10417068	0.0027874	0.893	0.66	down	---
10453485	0.0041776	0.893	0.66	down	---
10560028	0.0126568	0.893	0.65	down	Vmn2r54
10347220	0.0006104	0.839	0.64	down	---
10347224	0.0006104	0.839	0.64	down	---
10379650	0.0006104	0.839	0.64	down	---
10347222	0.0006095	0.839	0.63	down	---
10388160	0.0003497	0.774	0.63	down	Slc13a5
10499932	3.2e-05	0.462	0.61	down	Lce1h
